# Supplementary material
Source: publisher figshare collection journal article supplement (https://acs.figshare.com/ndownloader/files/13549532)
Supplement: Supplementary file 1 [file 13549532]

Compound	SMILES
12	CC(NC1=CC=C(C2=C(C#N)C(N)=NC(SC)=C2C#N)C=C1)=O.[ ]
13	CC(NC1=CC=C(C2=C(C#N)C(N)=NC(SC)=N2)C=C1)=O
14	NC1=NC(SC)=C(C#N)C(C2=CC=C(OC)C=C2)=C1C#N
15	NC1=NC(SC)=NC(C2=CC=C(OC)C=C2)=C1C#N
21a	NC1=NC(SCC2=CC=CC(C)=N2)=NC(C3=CC=C(OC)C=C3)=C1C#N
21b	NC1=NC(SCC2=CC=CC(C)=N2)=NC(C3=CC(OC)=CC=C3)=C1C#N
21c	NC1=NC(SCC2=NC=CN2)=NC(C3=CC=C(OC)C=C3)=C1C#N
21d	NC1=NC(SCC2=NC=CN2)=NC(C3=CC(OC)=CC=C3)=C1C#N
21e	NC1=NC(SCC2=CC=CC(C)=N2)=NC(C3=CC(O)=CC=C3)=C1C#N
21f	NC1=NC(SCC2=NC=CN2)=NC(C3=CC(O)=CC=C3)=C1C#N
22a	NC1=NC(SCC2=CC=CC(C)=N2)=C(C#N)C(C3=CC=C(OC)C=C3)=C1C#N
22b	NC1=NC(SCC2=CC=CC(C)=N2)=C(C#N)C(C3=CC(OC)=CC=C3)=C1C#N
22e	NC1=NC(SCC2=CC=CC(C)=N2)=C(C#N)C(C3=CC(O)=CC=C3)=C1C#N
22g	NC1=NC(SCC2=CC=CC(C)=N2)=C(C#N)C(C3=CC=C(NC(C)=O)C=C3)=C1C#N
